# Supplementary material for: Multi-Objective Optimization of Coastal Aquifer Management Based on Temporal GALDIT and Explainable Deep Learning Models
Source: Research Square preprint supplement (doi:10.21203/rs.3.rs-7750199/v1), 2025-12-16
Supplement: Supplementary file 1 [file 8c8bff4961877e3ffadb8d20.docx]

**Supplementary Material**

**Multi-Objective Optimization of Coastal Aquifer Management Based on Temporal GALDIT and Explainable Deep Learning Models**


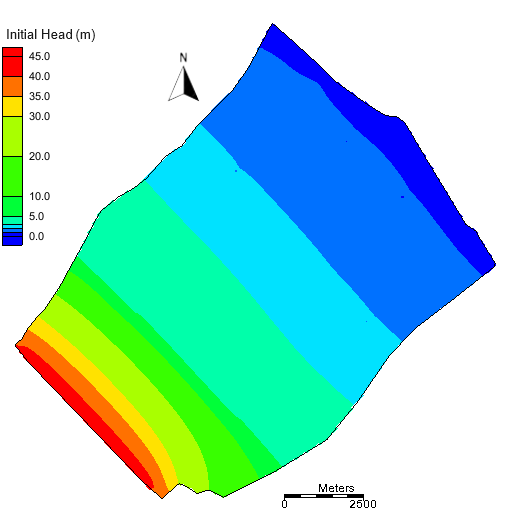


**Figure S1.** The initial water level (meters) map of the Wadi al-Jizi aquifer.

**Figure S2.** Time changes in vulnerable areas of the Wadi Al Jizi aquifer determined using the GALDIT method.

**Figure S3.** Average annual pumping rates of the Wadi Al Jizi aquifer wells (1 through 22) from 2000 to 2017.

**Figure S4.** The average annual recharge rate of the Wadi Al Jizi aquifer from 2000 to 2017.

**Figure S5.** The impact of recharge well configurations on observation wells’ average hydraulic head change.

**Figure S6.** The impact of pumping rate reduction scenarios on observation wells’ average hydraulic head change.

**Figure S7.** The effect of dam runoff rate on average hydraulic head changes for 50 recharge wells.

**Figure S8.** The effect of the percentage of wastewater injected into the aquifer on average hydraulic head changes for 50 recharge wells.

**Figure S9.** The effect of treated wastewater volume on average hydraulic head changes for 50 recharge wells.


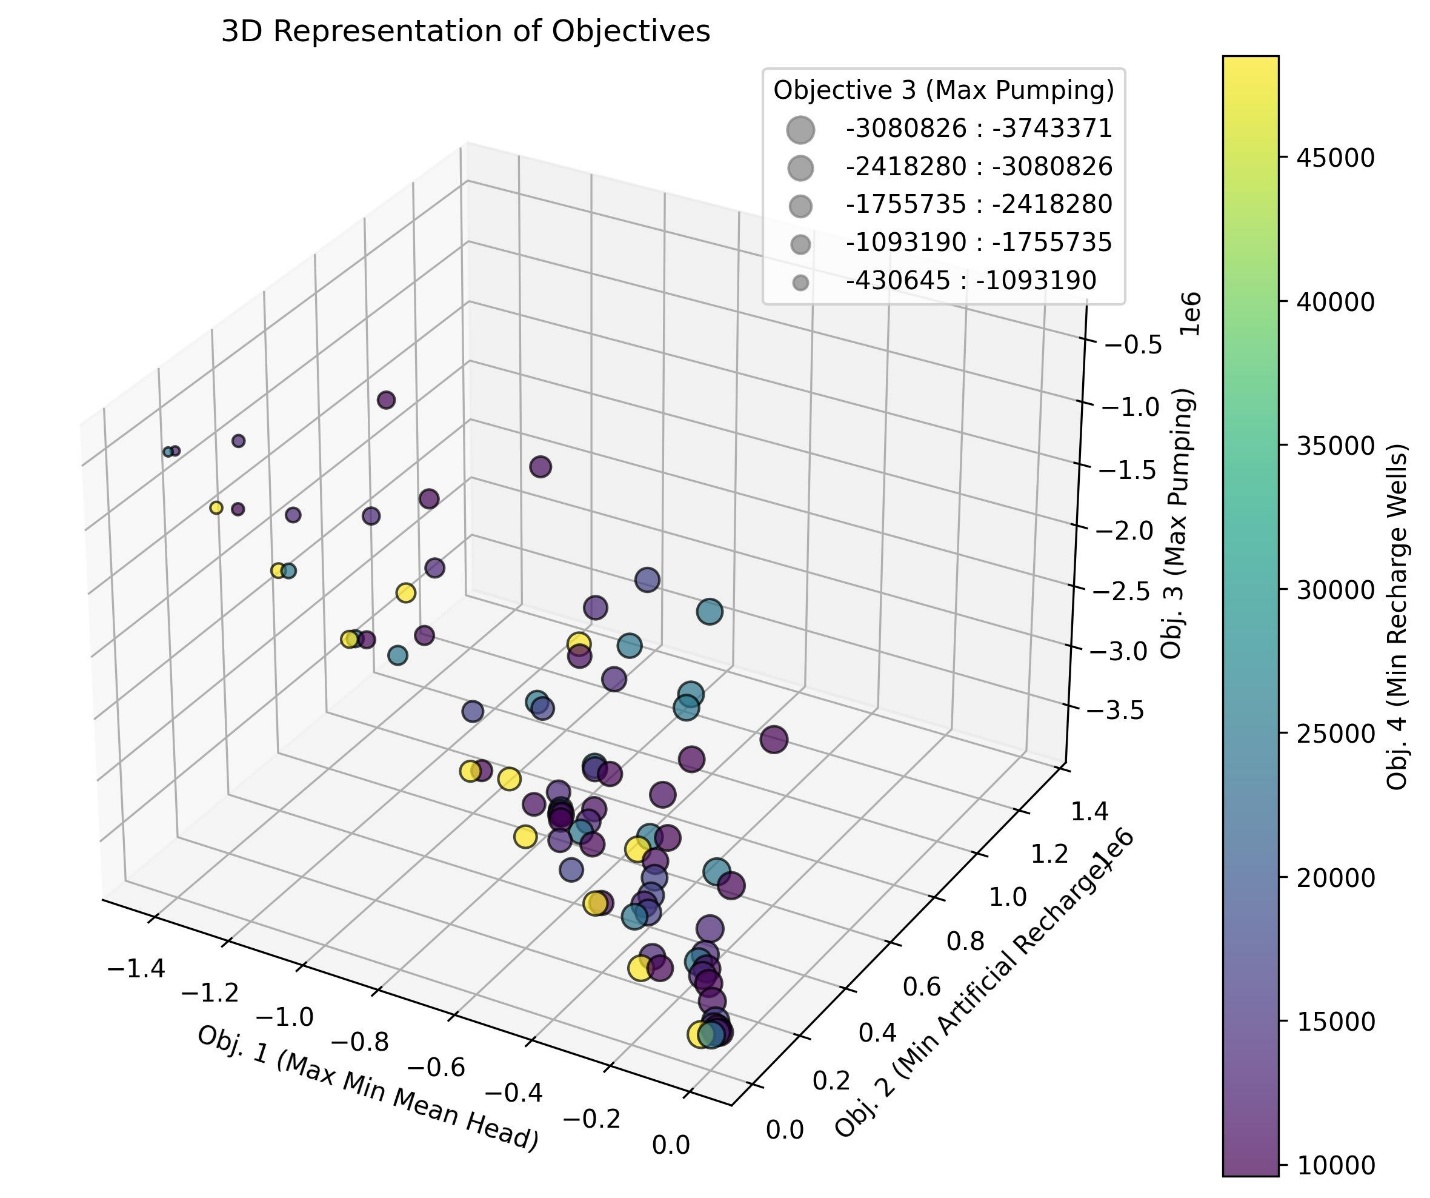


**Figure S10.** 3D Pareto front obtained for the groundwater management model.

In Fig. S10, the x-axis corresponds to Objective 1, the y-axis to Objective 2, and the z-axis to Objective 3. The color gradient of the points, as shown by the color bar, represents Objective 4. Each point in the graph represents a potential solution, highlighting the trade-offs between competing objectives. Solutions near the Pareto-optimal front demonstrate the best possible compromises among these objectives. Brighter colors (yellow) indicate higher costs (more recharge wells), while darker colors (purple) indicate lower costs.


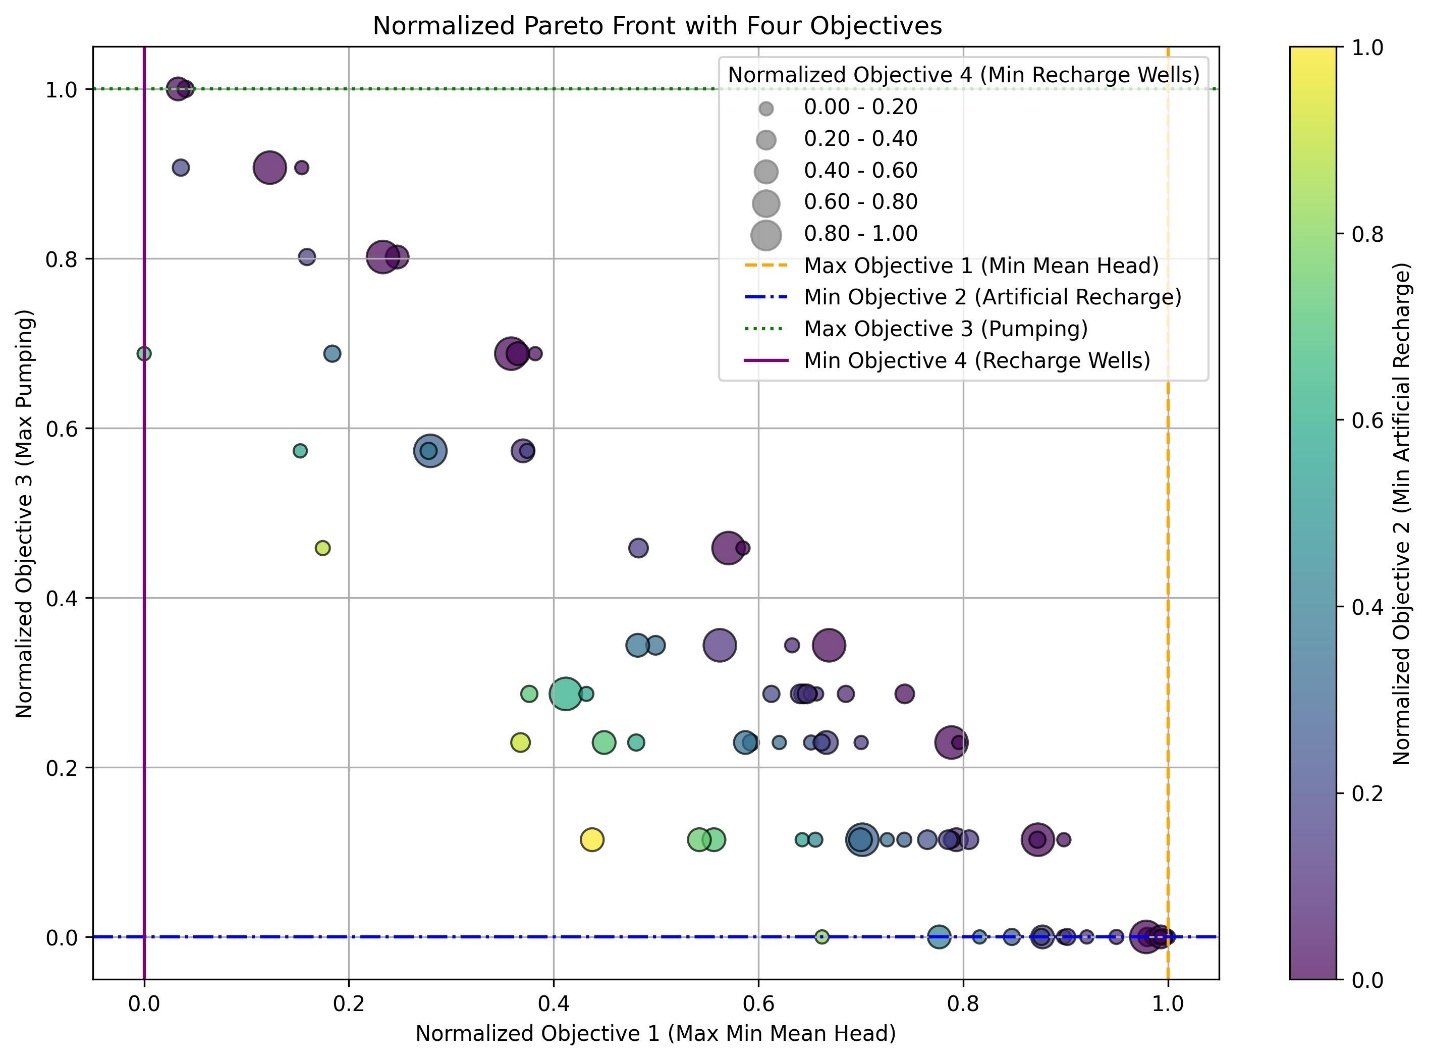


**Figure S11.** Normalized Pareto front showing the distribution of solutions with normalized objectives.

Fig. S11 visualizes the normalized Pareto front where all objectives are scaled between 0 and 1 using the Min-Max normalization technique. Additionally, vertical and horizontal dashed lines mark the extreme values of each normalized objective (e.g., maximum/minimum values for Objectives 1–4) to emphasize trade-offs.
